# Supplementary material for: Nitrogen-doped titania nanosheets towards visible light response
Source: Royal Society of Chemistry journal article supplement (doi:10.1039/b820483g), 2009-01-01
Supplement: b820483g.pdf [file b820483g.pdf]

## Supporting Information

### Nitrogen Doped Titania Nanosheets Towards Visible Light Response

Gang Liu<sup>a,b</sup>, Lianzhou Wang<sup>a</sup>, Chenghua Sun<sup>a</sup>, Zhigang Chen<sup>b</sup>, Xiaoxia Yan<sup>a</sup>, Lina Cheng<sup>a</sup>, Hui-Ming Cheng<sup>b\*</sup>, Gao Qing Lu<sup>a\*</sup>

*<sup>a</sup>ARC Centre of Excellence for Functional Nanomaterials, School of Engineering and Australian Institute of Bioengineering and Nanotechnology, The University of Queensland, Qld. 4072, Australia*

*<sup>b</sup>Shenyang National Laboratory for Materials Science, Institute of Metal Research, Chinese Academy of Sciences, 72 Wenhua Road, Shenyang 110016, China*

E-mail: Gao Qing Max Lu, [maxlu@uq.edu.au](mailto:maxlu@uq.edu.au); Hui-Ming Cheng, [cheng@imr.ac.cn](mailto:cheng@imr.ac.cn)

## Experimental Section

Layered titanate precursor of  $\text{Cs}_{0.68}\text{Ti}_{1.83}\text{O}_4$  was prepared according to a procedure previously reported. [1] Nitrogen doping in layered titanate was conducted by calcining the white  $\text{Cs}_{0.68}\text{Ti}_{1.83}\text{O}_4$  powder at 750 °C in ammonia atmosphere for 2 hrs, resulting in nitrogen doped  $\text{Cs}_{0.68}\text{Ti}_{1.83}\text{O}_{4-x}\text{N}_x$  powder with a bright yellow color. Its protonated form of  $\text{H}_{0.68}\text{Ti}_{1.83}\text{O}_{4-x}\text{N}_x$  was prepared by ion-exchange of  $\text{Cs}_{0.68}\text{Ti}_{1.83}\text{O}_{4-x}\text{N}_x$  with  $\text{H}^+$  in 1 mol·dm<sup>-3</sup> HCl solution for three days. The resulting yellow  $\text{H}_{0.68}\text{Ti}_{1.83}\text{O}_{4-x}\text{N}_x$  (1.2g) sample was dispersed in a tetrabutylammonium hydroxide (TBAOH) solution (300 cm<sup>3</sup>, 0.2 mol·dm<sup>-3</sup>) and was shaken for more than 7 days at room temperature to exfoliate into a yellow colloidal suspension of  $\text{Ti}_{0.91}\text{O}_{2-x}\text{N}_x$  nanosheets. To make a thin film photoelectrode,  $\text{Ti}_{0.91}\text{O}_{2-x}\text{N}_x$  nanosheets were deposited on pre-treated quartz glass, silicon wafer, or ITO glass substrates via the electrostatic (layer-by-layer) LBL self-assembly method reported previously. [17] The substrate was first dipped in a polyethyleneimine (PEI) solution (0.125 wt%, pH = 9) for 20 min and then rinsed thoroughly with distilled water. Subsequently, the PEI coated substrate was immersed into the colloidal suspension of  $\text{Ti}_{0.91}\text{O}_{2-x}\text{N}_x$  nanosheets (0.08 g·dm<sup>-3</sup>, pH = 9) for 20 min, followed by rinsing in water and drying in nitrogen gas flow. Deposition of (PEI/ $\text{Ti}_{0.91}\text{O}_{2-x}\text{N}_x$ ) was repeated to reach desirable layer numbers for the fabrication of multilayer thin film.

Measurements of photoelectrochemical water-splitting process were conducted in a quartz cell in a three-electrode system with a Pt foil and Ag/AgCl electrode as counterpart electrode and reference electrode, respectively. The electrolyte was 0.1

$\text{mol}\cdot\text{dm}^{-3}$  NaOH solution. Visible light irradiation in the range of 420 nm to 770 nm was supplied by a Xe lamp with the filter glasses. Photocurrent was recorded with the Solartron 1480 Multistat electrochemical measurement unit.

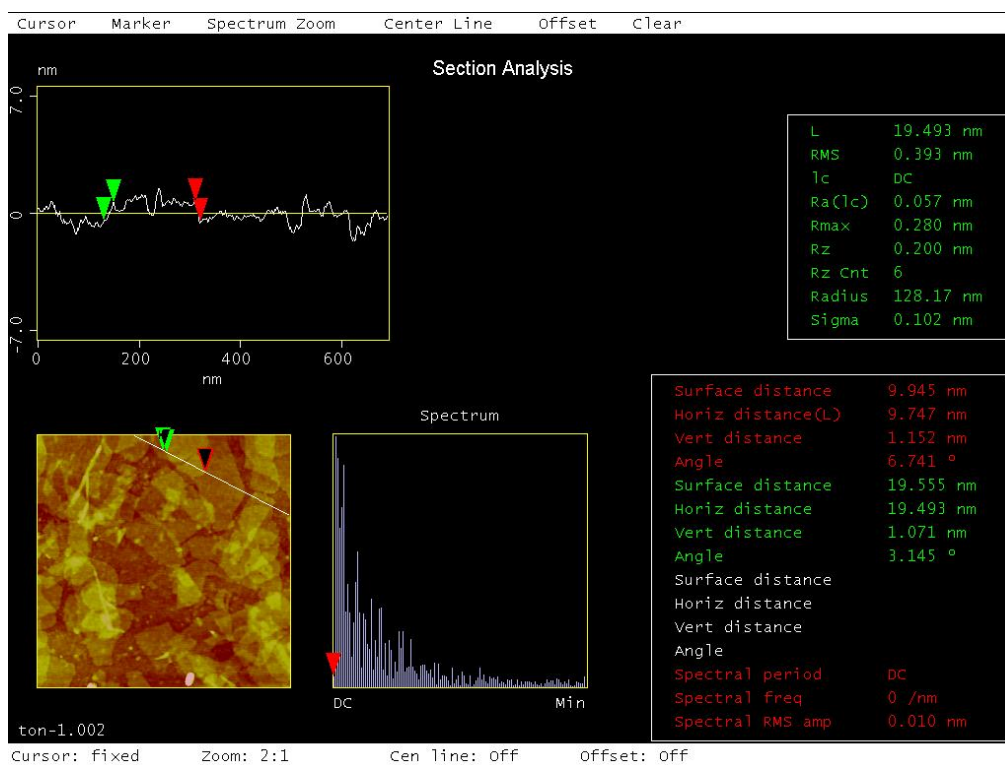

**Fig. S1** The thickness measurement in AFM image of  $\text{Ti}_{0.91}\text{O}_{2-x}\text{N}_x$  nanosheets on Si wafer.

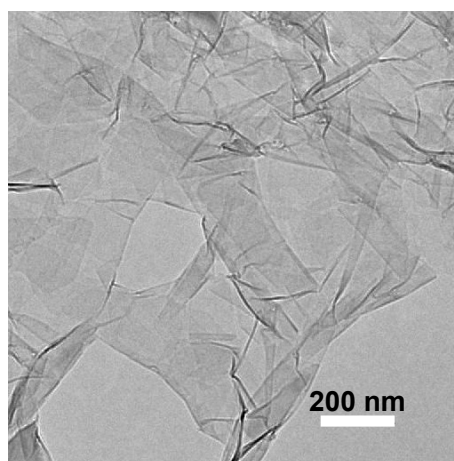

**Fig. S2** TEM image of exfoliated  $\text{Ti}_{0.91}\text{O}_{2-x}\text{N}_x$  nanosheets loaded on copper grid.

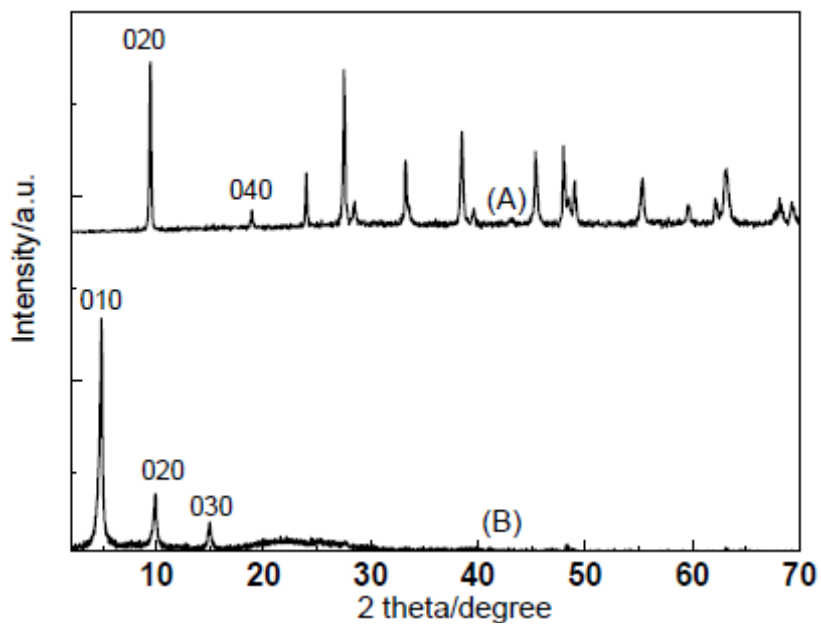

**Fig. S3** XRD patterns of layered  $\text{H}_{0.68}\text{Ti}_{1.83}\text{O}_{4-x}\text{N}_x$  (A) and restacked  $\text{Ti}_{0.91}\text{O}_{2-x}\text{N}_x$  nanosheets.

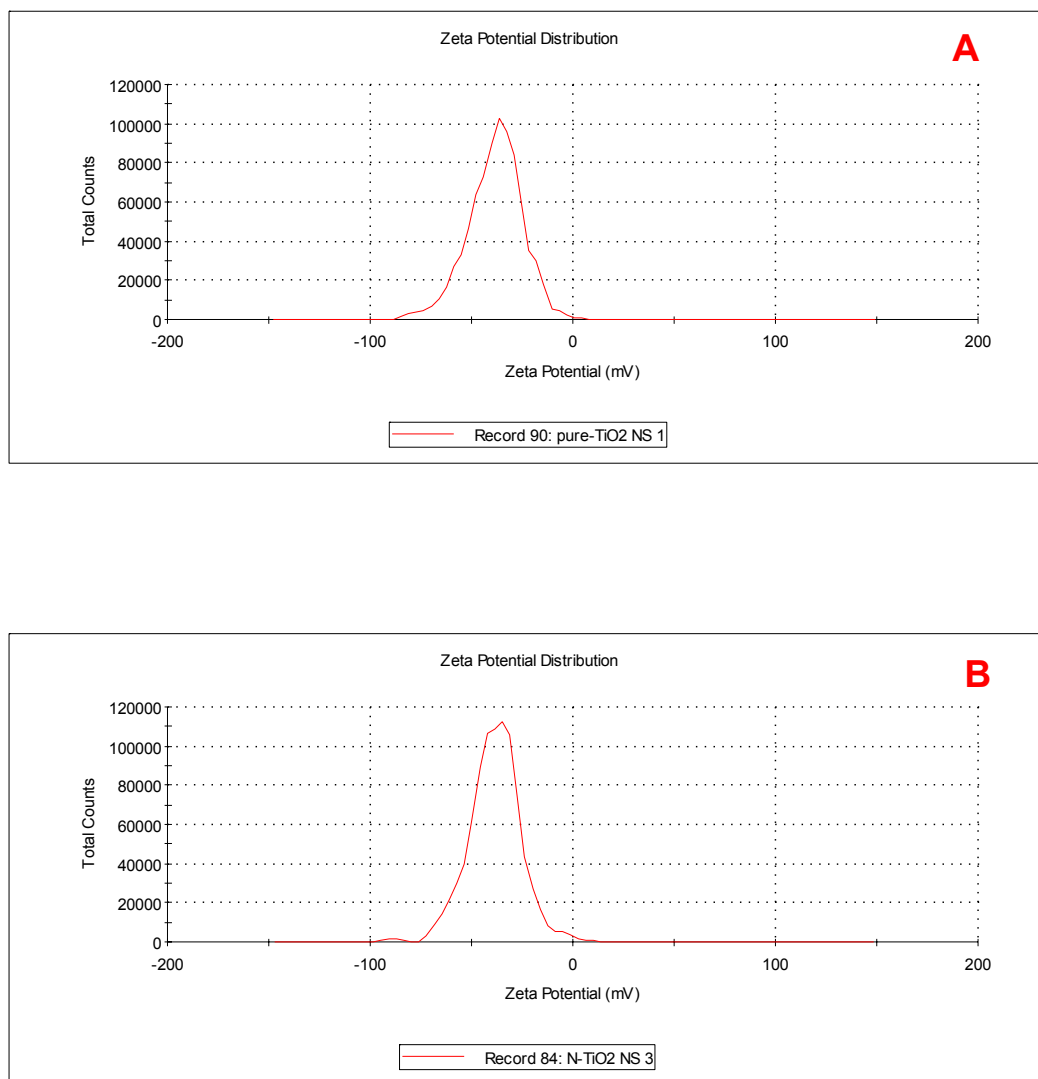

**Fig. S4.** Zeta-potential of  $\text{Ti}_{0.91}\text{O}_2$  (A) and  $\text{Ti}_{0.91}\text{O}_{2-x}\text{N}_x$  (B) nanosheets.

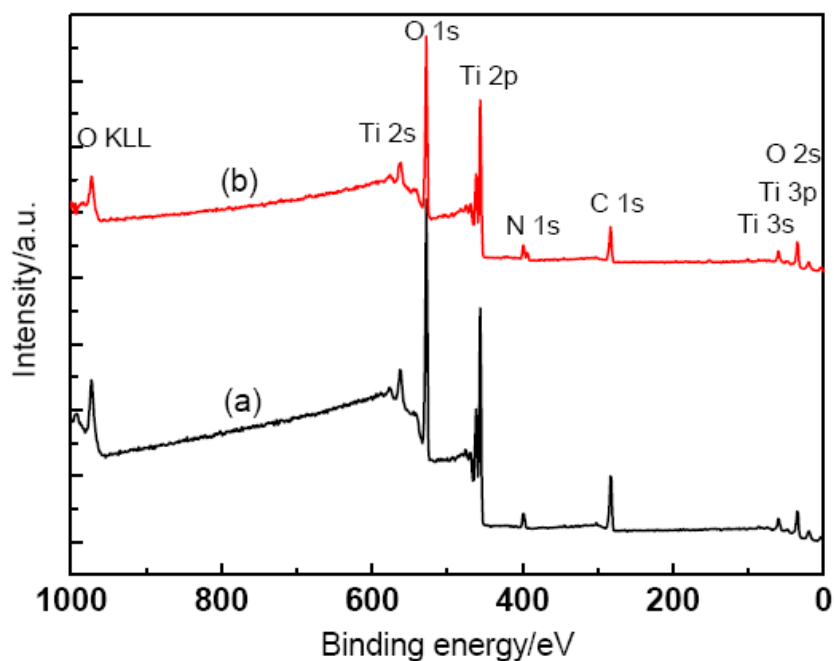

**Fig. S5.** XPS survey of (PEI/Ti<sub>0.91</sub>O<sub>2</sub>)<sub>10</sub> (a) and (PEI/Ti<sub>0.91</sub>O<sub>2-x</sub>N<sub>x</sub>)<sub>10</sub> (b) nanosheets deposited on quartz substrates.

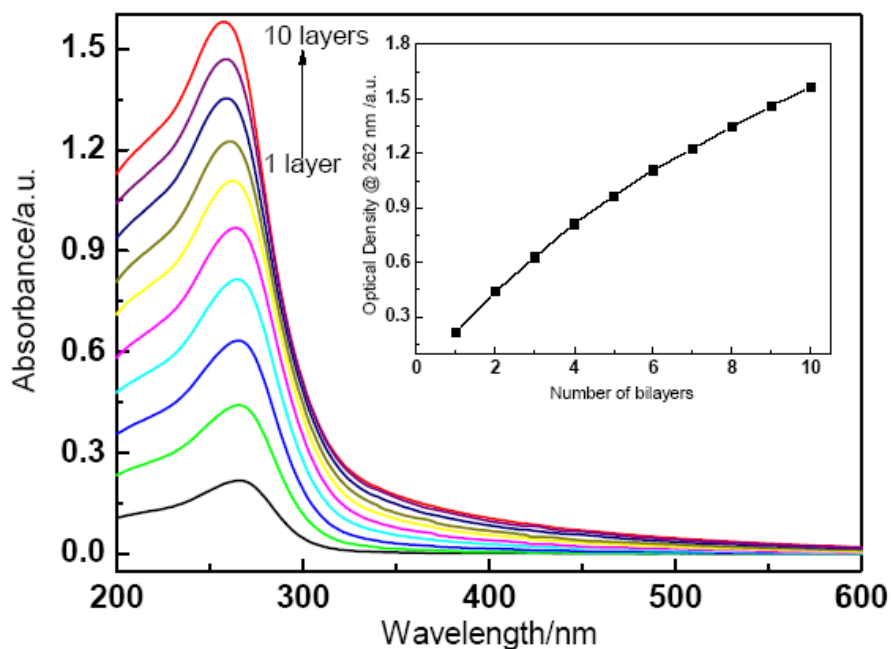

**Fig. S6.** UV-visible absorption spectra for multilayer films of (PEI/ Ti<sub>0.91</sub>O<sub>2</sub>)<sub>n</sub> on a quartz glass substrate. The inserted figure is the dependence of peak absorbance at 262 nm on the number of deposition cycles.
